# Supplementary material for: Multi-responsive fluorescent switches and iodine capture of porous hydrogen-bonded self-assemblies
Source: Royal Society of Chemistry journal article supplement (doi:10.1039/d1tc02366g), 2021-01-01
Supplement: d1tc02366g1.pdf [file d1tc02366g1.pdf]

**Multiple-responsive fluorescence switches and iodine capture of  
four-armed divinylanthracene**

Xinyu Chen, Tong Zhang, Yanning Han, Qiao Chen, Chengpeng Li, Pengchong Xue\*  
Tianjin Key Laboratory of Structure and Performance for Functional Molecules,  
College of Chemistry, Tianjin Normal University, No. 393 Bin Shui West Road,  
Tianjin, 300387, PR China. Email: xuepengchong@126.com; hxxyxpc@tjnu.edu.cn

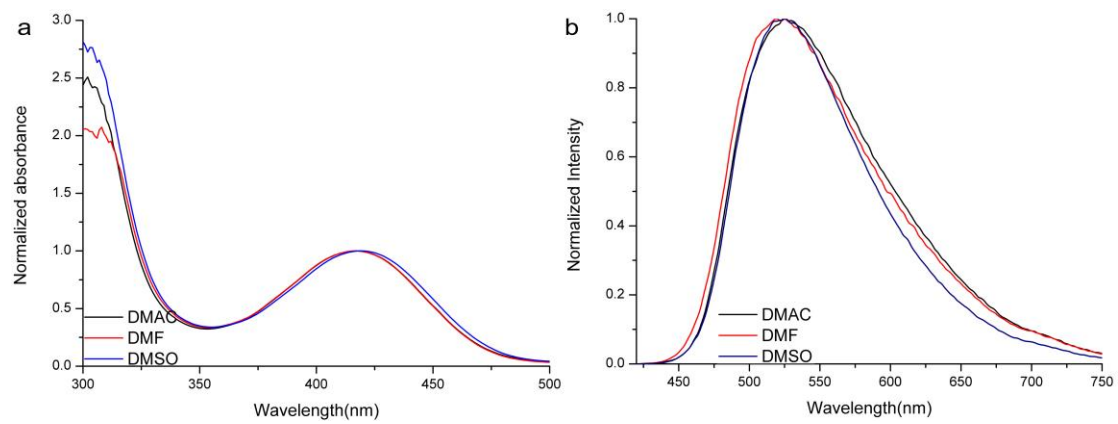

**Figure S1.** Normalized absorption and emission spectra of ENTDAT in different solvents.

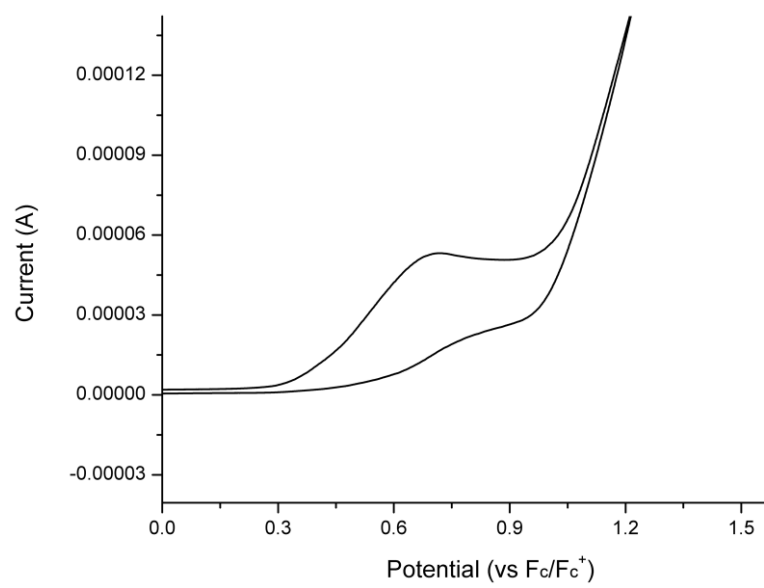

**Figure S2.** CV curve of ENTDAT in DMF.

**Table S1.** Photophysical data of ENTDAT obtained by quantum chemical calculation in DMF.

|  | Energy levels<br>(eV) |       | Dipole<br>moment<br>(Debye) | Transition | Transition<br>assignment | E (eV) | $\lambda_{\text{abs}}$<br>(nm) | Oscillator<br>strength |
|--|-----------------------|-------|-----------------------------|------------|--------------------------|--------|--------------------------------|------------------------|
|  | H                     | L     |                             |            |                          |        |                                |                        |
|  | ENTDAT                | -5.10 |                             |            |                          |        |                                |                        |
|  |                       |       |                             |            | H-5→L (45.1%)            |        |                                |                        |
|  |                       |       |                             | S0→S2      | H-5→L+6 (2.2%)           | 3.9850 | 311.45                         | 0.0005                 |
|  |                       |       |                             |            | H→L+7 (46.3%)            |        |                                |                        |
|  |                       |       |                             |            | H-2→L+1 (2.4%)           |        |                                |                        |
|  |                       |       |                             |            | H-1→L (5.7 %)            |        |                                |                        |
|  |                       |       |                             |            | H-1→L+1 (3.7%)           |        |                                |                        |
|  |                       |       |                             | S0→S3      | H→L+1 (21.3%)            | 4.2040 | 294.92                         | 0.01728                |
|  |                       |       |                             |            | H→L+3 (6.4 %)            |        |                                |                        |
|  |                       |       |                             |            | H→L+4 (3.3%)             |        |                                |                        |
|  |                       |       |                             |            | H→L+5 (26.6%)            |        |                                |                        |
|  |                       |       |                             |            | H→L+6 (16.9%)            |        |                                |                        |

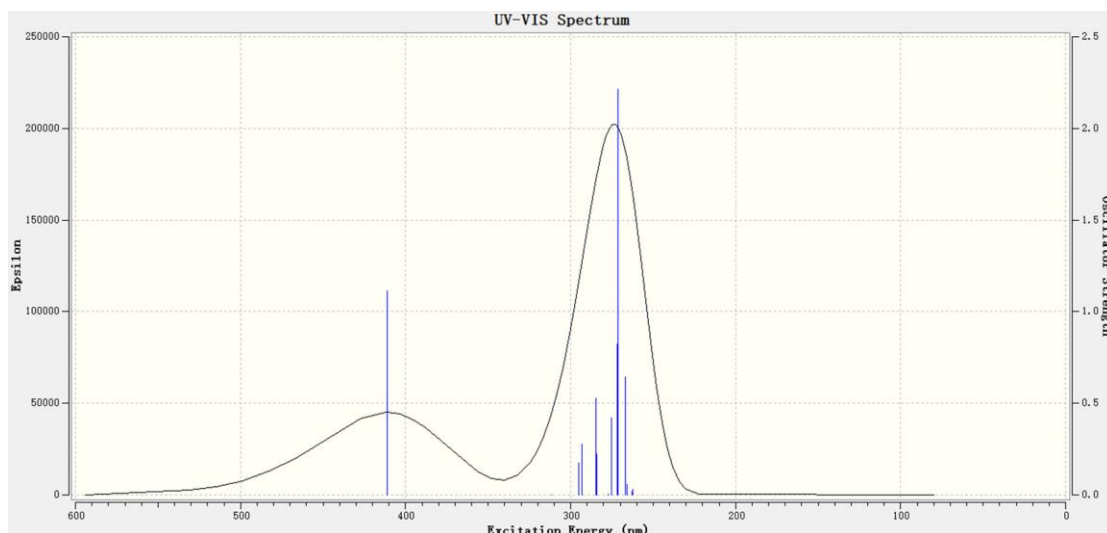

**Figure S3.** Simulated absorption spectrum of ENTDAT in DMF.

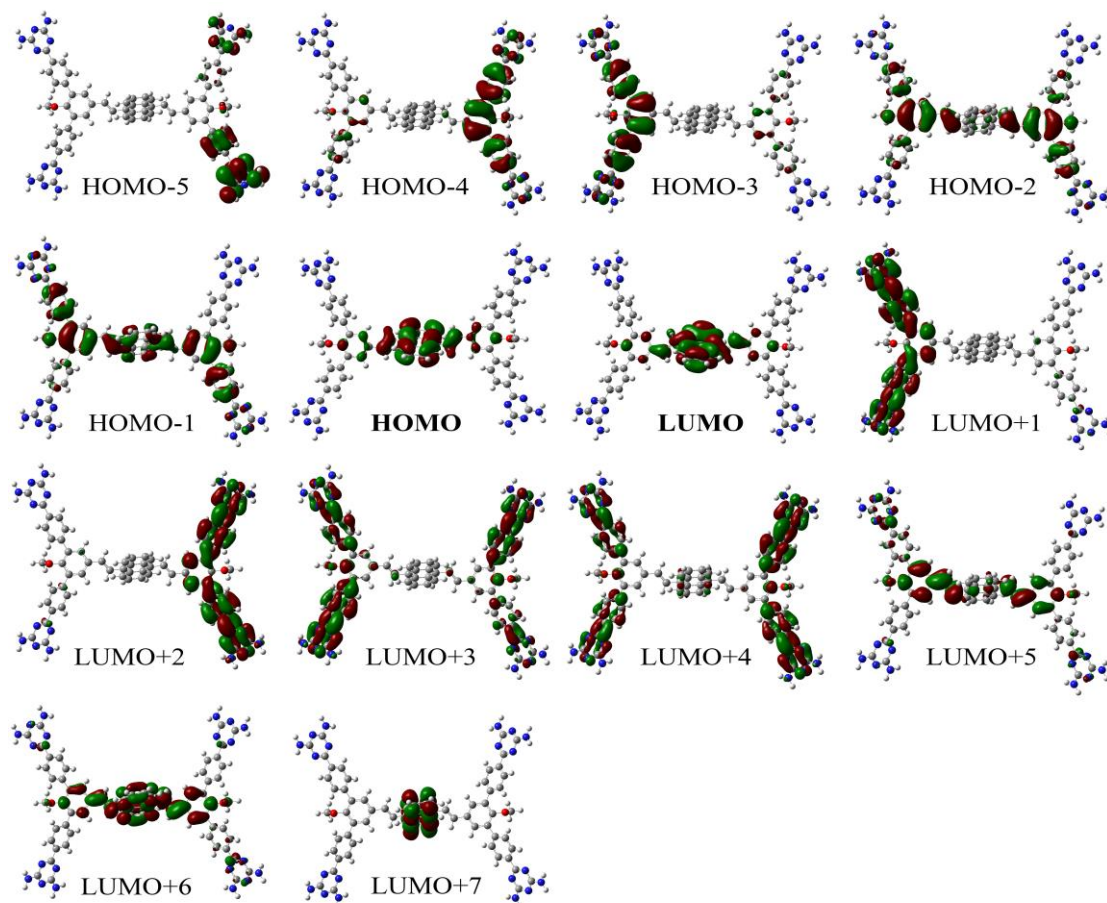

**Figure S4.** The distributions of frontier orbitals of ENTDAT.

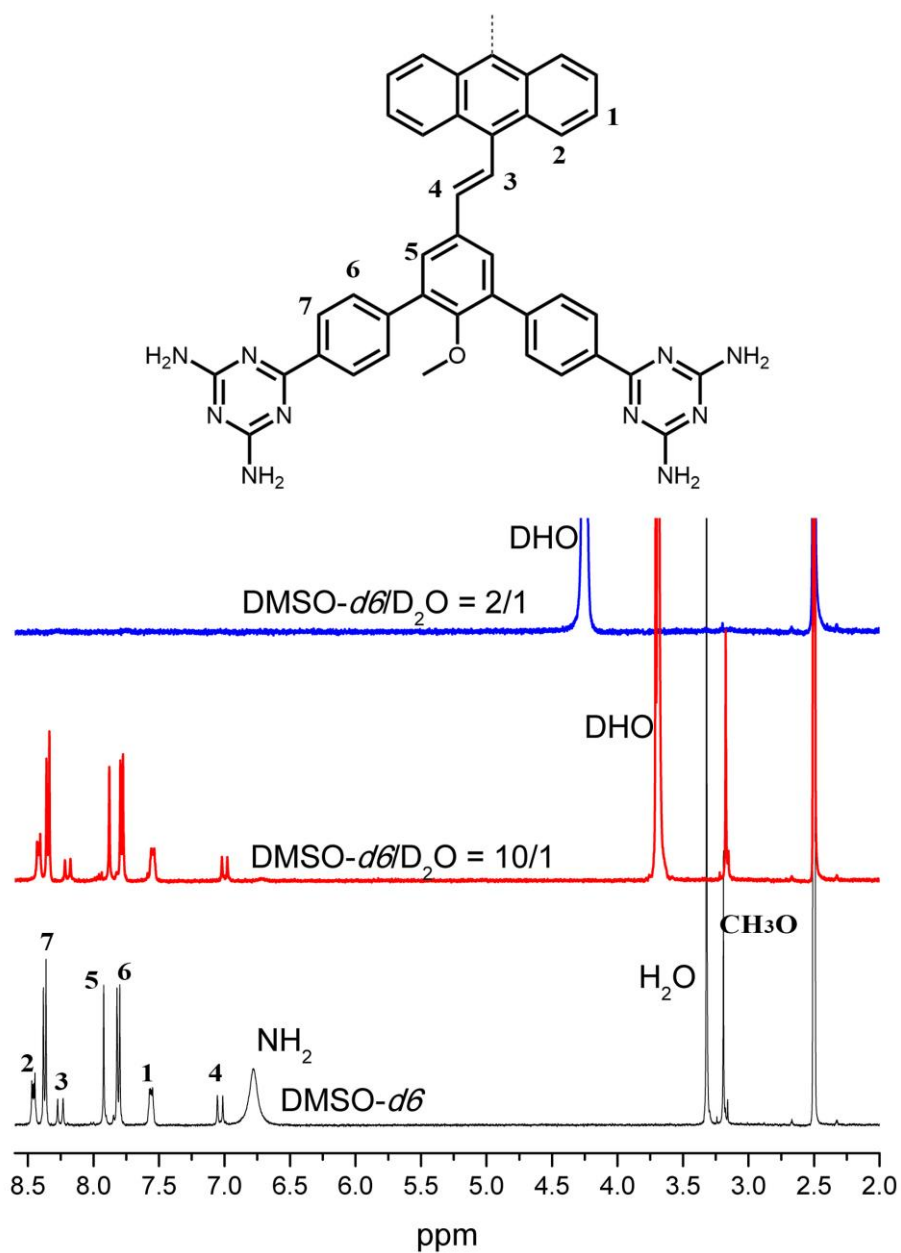

**Figure S5.** <sup>1</sup>H NMR spectrum of ENTDAT in different solvents (C = 2.0mg/mL).

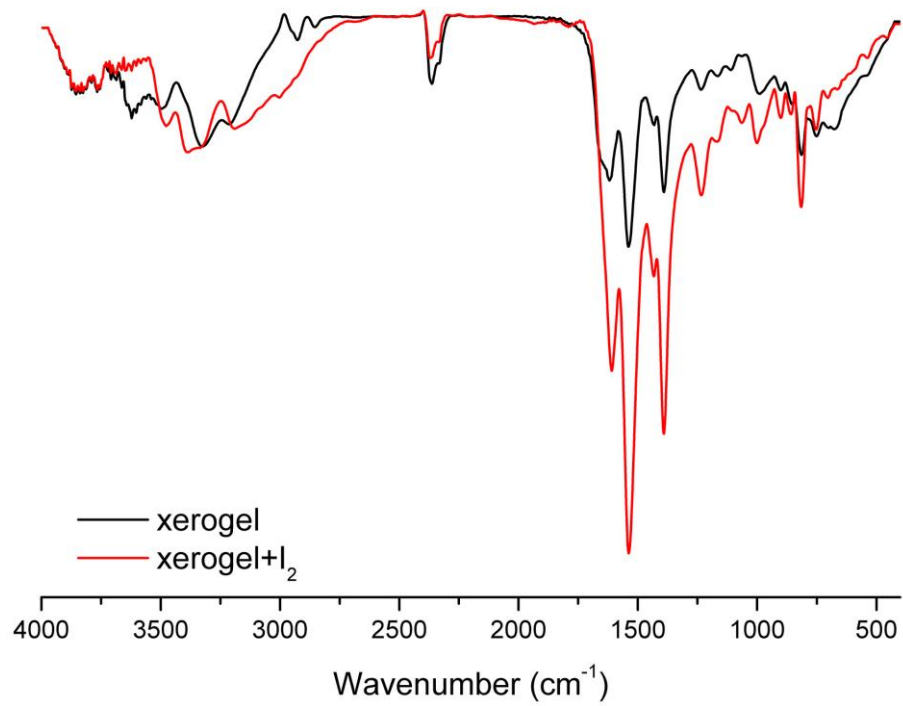

**Figure S6.** FT-IR spectra of xerogels before and after absorbing I<sub>2</sub> for 2 h in aqueous solution.

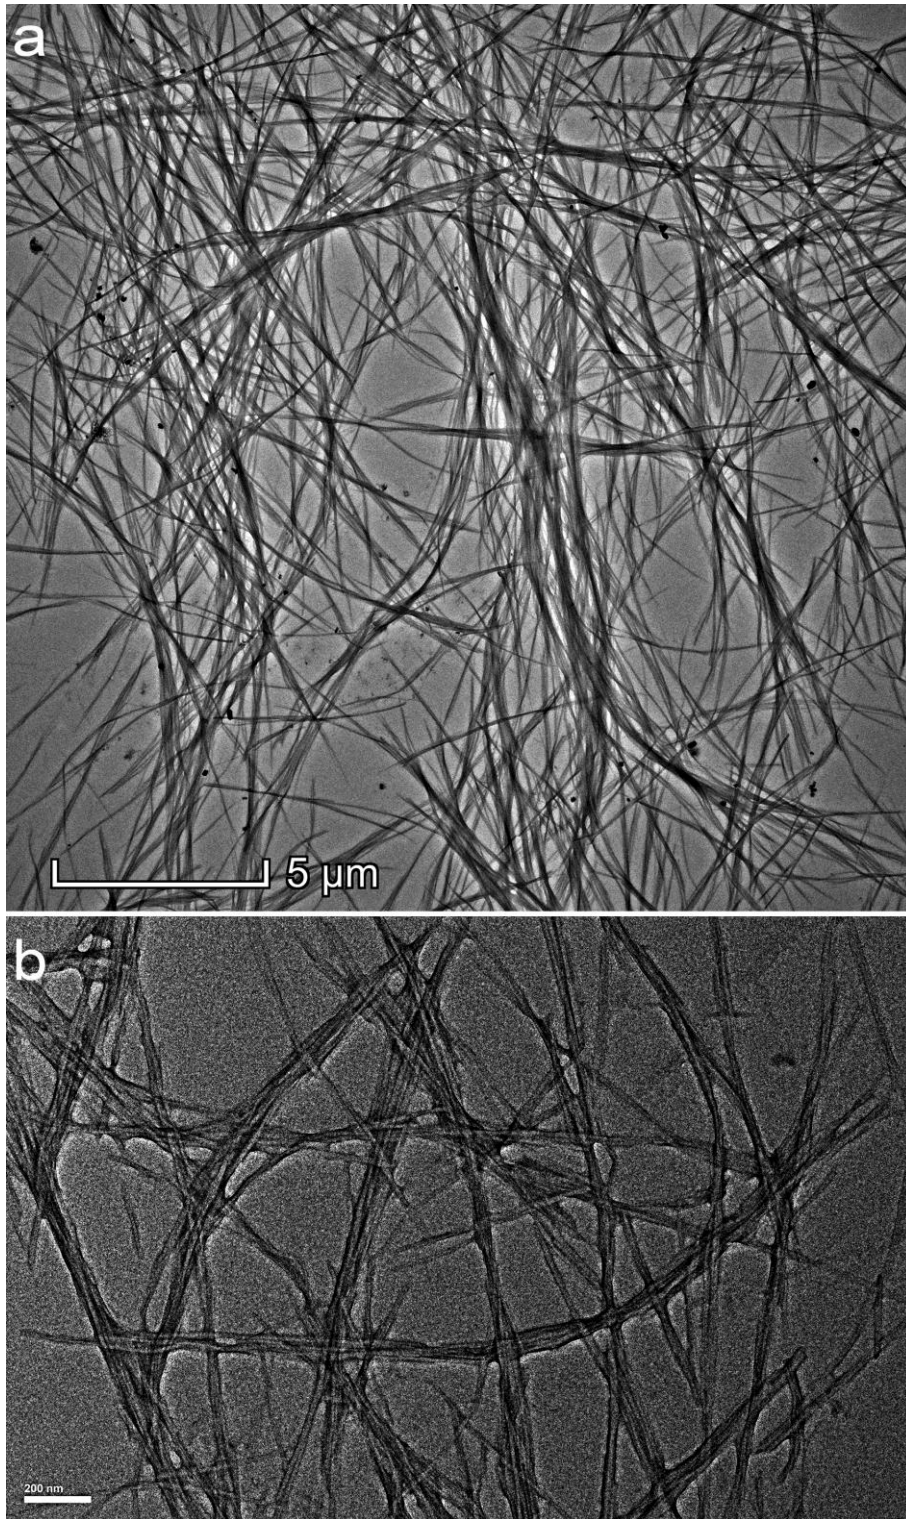

**Figure S7.** (a) Large-scale normal and (b) negative staining TEM images of DMF/H<sub>2</sub>O gel.



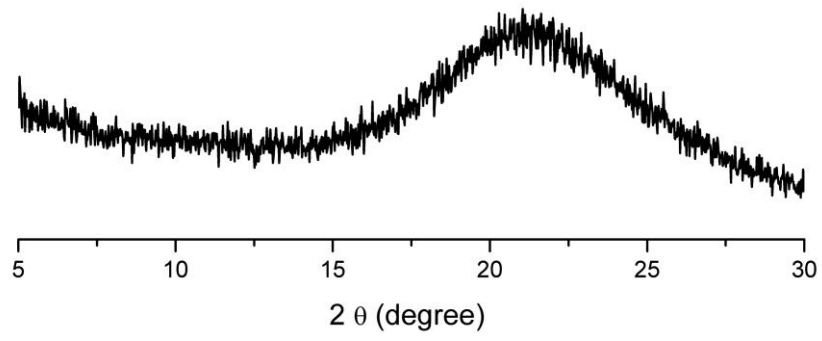

**Figure S8.** XRD pattern of xerogel solids.

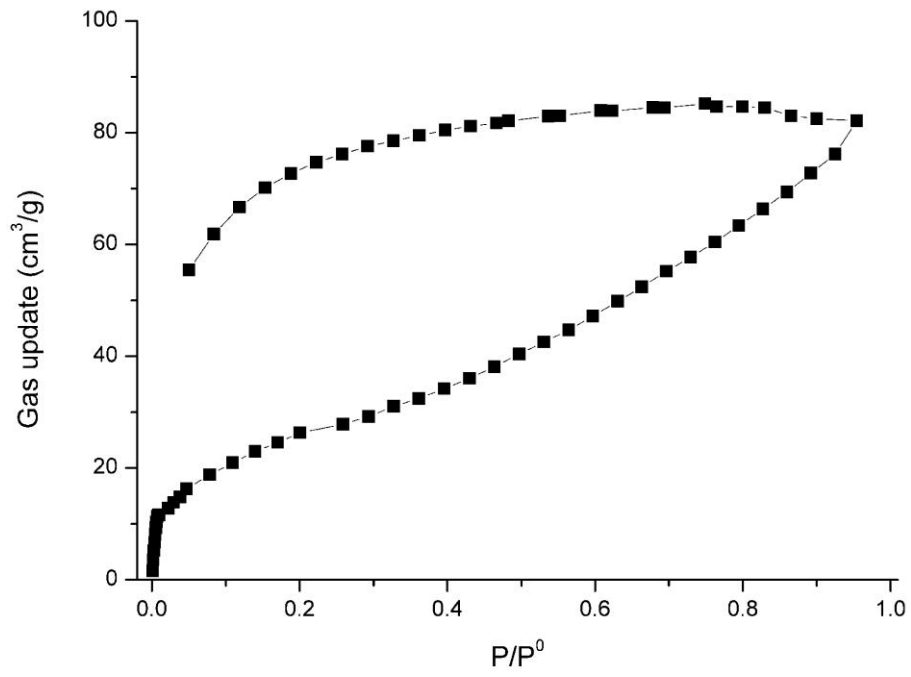

**Figure S9.** CO<sub>2</sub> sorption and desorption isotherms at 196 K.

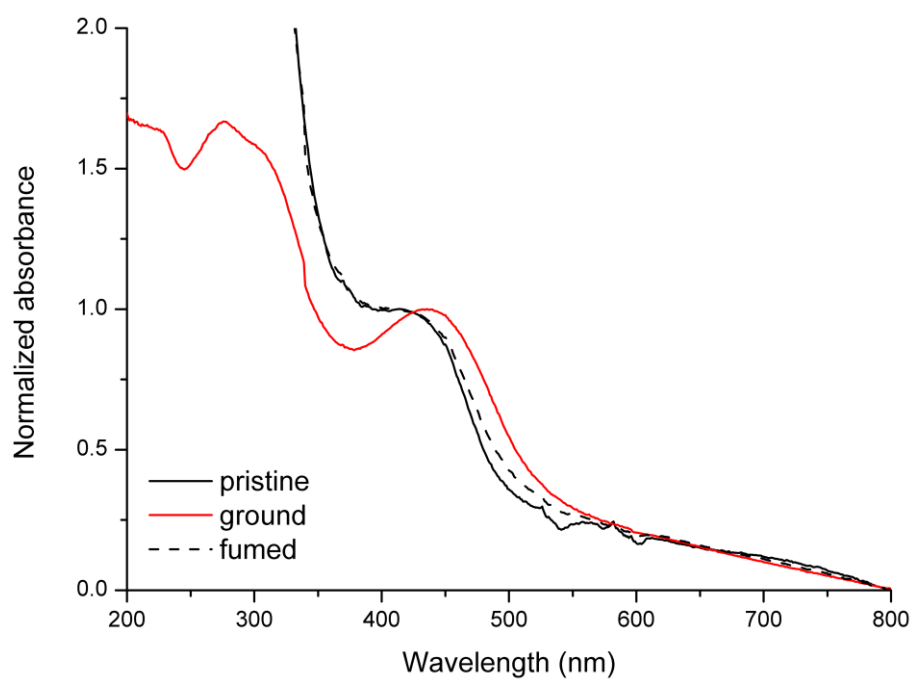

**Figure S10.** UV-Vis absorption spectra of gel film in different states.

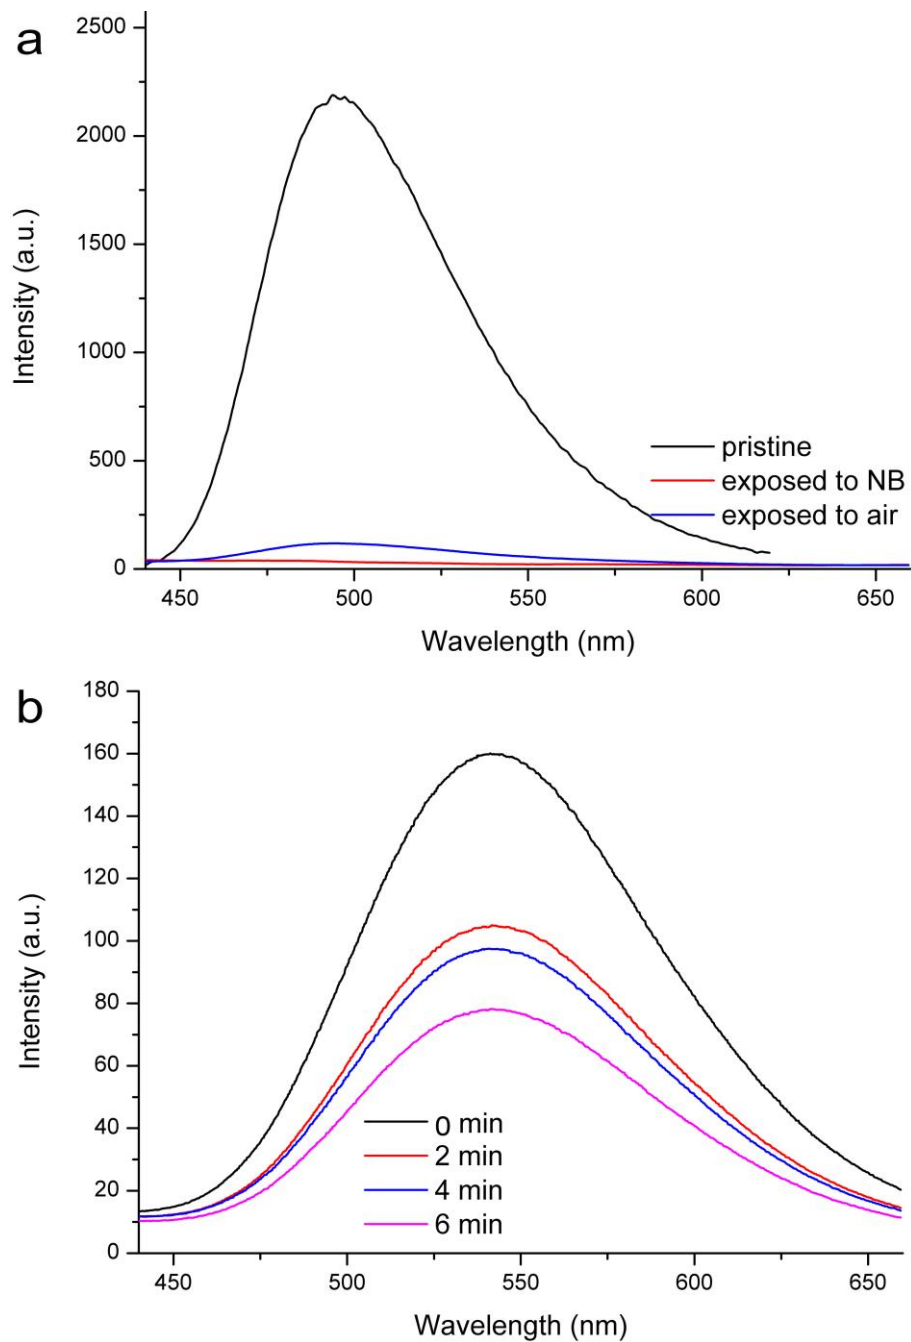

**Figure S11.** Fluorescence changes of (a) the pristine gel film exposed to saturated NB vapor for 2 s or air for 10 min, and (b) ground gel films exposed to saturated NB vapor.

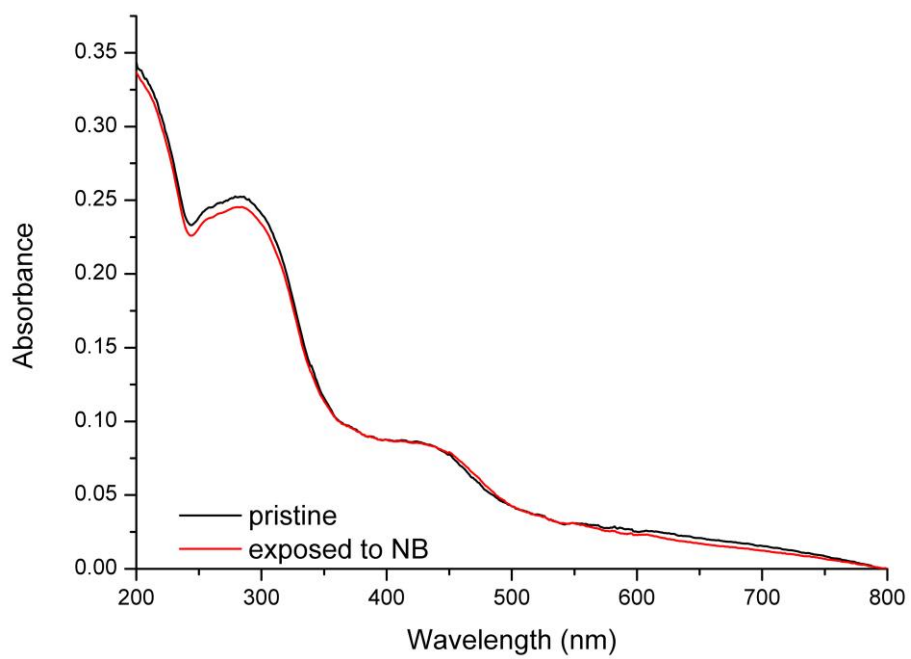

**Figure S12.** Absorption spectra of the gel film before and after exposing to saturated NB vapor.

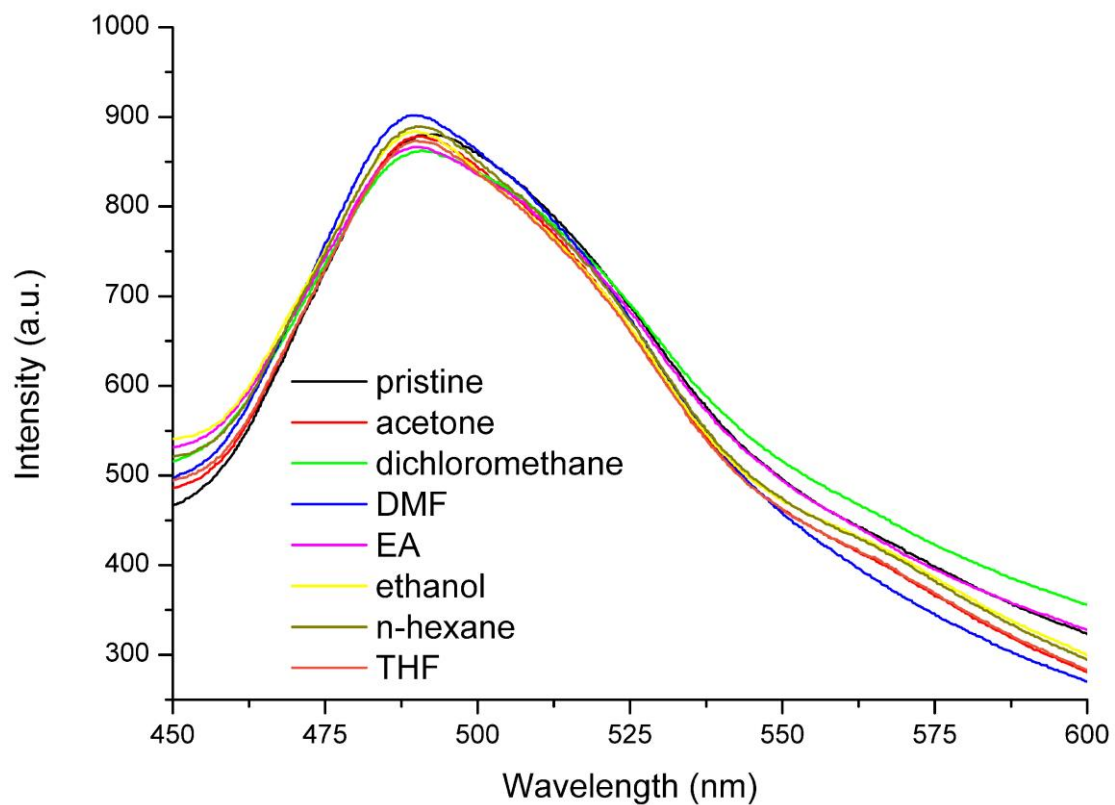

**Figure S13.** Fluorescence changes of the gel film upon exposure to different solvent vapors (200 ppm).
